# Supplementary material for: Meta-Analysis of Infectious Agents and Depression
Source: PubMed Central journal article supplement — Sci Rep. 2014 Mar 31;4:4530. doi: 10.1038/srep04530 (PMC5380112; doi:10.1038/srep04530), 2014-03-31
Supplement: srep04530-s1.pdf [file srep04530-s1.pdf]

## Supplemental material: Meta-analysis associates infectious agents with depression

Xiao Wang<sup>1,2\*</sup>, Liang Zhang<sup>1,2,3\*</sup>, Yang Lei<sup>1,2,3\*</sup>, Xia Liu<sup>1,2,3\*</sup>, Xinyu Zhou<sup>1,2,3</sup>, Yiyun Liu<sup>1,2,3</sup>, Mingju Wang<sup>1,2,3</sup>, Liu Yang<sup>1,2</sup>, Lujun Zhang<sup>1,2</sup>, Songhua Fan<sup>1,2,3</sup>, and Peng Xie<sup>1,2,3#</sup>

<sup>1</sup>Institute of Neuroscience, Faculty of Basic Medicine, Chongqing Medical University, Chongqing, China; <sup>2</sup>Chongqing Key Laboratory of Neurobiology, Chongqing, China;

<sup>3</sup>Department of Neurology, The First Affiliated Hospital of Chongqing Medical University, Chongqing, China

#Address correspondence to Peng Xie, xiepeng@cqmu.edu.cn.

\*XW, LZ, YL, and XL contributed equally to this work.

**Table S1. Quality Assessment of Controls in the Included Studies.**

| Microorganism | Study                                           | Selection of Controls | Comparability of Cases and Controls |
|---------------|-------------------------------------------------|-----------------------|-------------------------------------|
| BDV           | Amsterdam JD et al. (1985) <sup>48</sup>        | YES                   | NO                                  |
|               | Bode L et al. (1992) <sup>17</sup>              | NO                    | NO                                  |
|               | Fu ZF et al. (1993) <sup>15</sup>               | YES                   | YES                                 |
|               | Bode L et al. (1995) <sup>30</sup>              | YES                   | NO                                  |
|               | Igata-Yi R et al. (1996) <sup>49</sup>          | NO                    | NO                                  |
|               | Salvatore M et al. (1997) <sup>50</sup>         | NO                    | NO                                  |
|               | Fukuda K et al. (2001) <sup>51</sup>            | YES                   | YES                                 |
|               | Bode L et al. (2001) <sup>29</sup>              | YES                   | NO                                  |
|               | Lebain P et al. (2002) <sup>52</sup>            | YES                   | NO                                  |
|               | Zou Dezhi et al. (2003) <sup>53</sup>           | YES                   | NO                                  |
|               | Wang Zhenhai et al. (2006) <sup>54</sup>        | YES                   | NO                                  |
|               | Zhao Libo et al. (2007) <sup>55</sup>           | YES                   | YES                                 |
|               | Flower RL et al. (2008) <sup>56</sup>           | NO                    | NO                                  |
|               | Na KS et al. (2009) <sup>28</sup>               | YES                   | NO                                  |
|               | Hornig M et al. (2012) <sup>16</sup>            | YES                   | YES                                 |
| HSV-1 (HHV-1) | Pokorny AD et al. (1973) <sup>12</sup>          | YES                   | NO                                  |
|               | Lycke E et al. (1974) <sup>18</sup>             | NO                    | NO                                  |
|               | Carter et al. (1987) <sup>35</sup>              | YES                   | NO                                  |
|               | Conejero-Goldberg C et al. (2003) <sup>23</sup> | YES                   | NO                                  |
| HSV-2 (HHV-2) | Conejero-Goldberg C et al. (2003) <sup>23</sup> | YES                   | NO                                  |
| VZV (HHV-3)   | Lycke E et al. (1974) <sup>18</sup>             | NO                    | NO                                  |

|                       |                                                 |     |     |
|-----------------------|-------------------------------------------------|-----|-----|
|                       | Carter et al. (1987) <sup>35</sup>              | YES | NO  |
|                       | Conejero-Goldberg C et al. (2003) <sup>23</sup> | YES | NO  |
| EBV (HHV-4)           | Amsterdam JD et al. (1986) <sup>38</sup>        | YES | YES |
|                       | Conejero-Goldberg C et al. (2003) <sup>23</sup> | YES | NO  |
|                       | Johnson N et al. (2011) <sup>20</sup>           | YES | YES |
|                       | Haeri S et al. (2011) <sup>19</sup>             | YES | YES |
| CMV (HHV-5)           | Lycke E et al. (1974) <sup>18</sup>             | NO  | NO  |
|                       | Carter et al. (1987) <sup>35</sup>              | YES | NO  |
|                       | Conejero-Goldberg C et al. (2003) <sup>23</sup> | YES | NO  |
| HHV-6                 | Conejero-Goldberg C et al. (2003) <sup>23</sup> | YES | NO  |
| <i>C. trachomatis</i> | Fellerhoff B et al. (2005) <sup>21</sup>        | YES | YES |
|                       | Fellerhoff B et al. (2007) <sup>22</sup>        | YES | YES |
| <i>C. pneumoniae</i>  | Fellerhoff B et al. (2005) <sup>21</sup>        | YES | YES |
|                       | Fellerhoff B et al. (2007) <sup>22</sup>        | YES | YES |
| <i>C. psittaci</i>    | Fellerhoff B et al. (2005) <sup>21</sup>        | YES | YES |
|                       | Fellerhoff B et al. (2007) <sup>22</sup>        | YES | YES |
| HBV                   | Faridullah Shah et al. (2004) <sup>57</sup>     | NO  | NO  |
|                       | Alvarado Esquivel C (2005) <sup>58</sup>        | NO  | NO  |
| <i>T. gondii</i>      | Conejero-Goldberg C et al. (2003) <sup>23</sup> | YES | NO  |
|                       | Alvarado-Esquivel C et al. (2006) <sup>59</sup> | YES | YES |
|                       | Cetinkaya Z et al. (2007) <sup>60</sup>         | YES | YES |
| HCV                   | Faridullah Shah et al. (2004) <sup>57</sup>     | NO  | NO  |
| JCV                   | Carter et al. (1987) <sup>35</sup>              | YES | NO  |
| BKV                   | Carter et al. (1987) <sup>35</sup>              | YES | NO  |
| Measles virus         | Lycke E et al. (1974) <sup>18</sup>             | NO  | NO  |

Explanation:

Selection of controls assesses whether the control series used in the study is derived from the same population as the cases

Comparability of cases and controls whether cases and controls are matched in the design and/or confounders are adjusted for in the analysis
